# Supplementary material for: Plasticizer and catalyst co-functionalized PEDOT:PSS enables stretchable electrochemical sensing of living cells
Source: Royal Society of Chemistry journal article supplement (doi:10.1039/d1sc04138j), 2021-01-01
Supplement: d1sc04138j1.pdf [file d1sc04138j1.pdf]

## Supporting Information

### Plasticizer and Catalyst Co-Functionalized PEDOT:PSS Enables Stretchable Electrochemical Sensing of Living Cells

*Jing Yan,<sup>a</sup> Yu Qin,<sup>a</sup> Wen-Ting Fan,<sup>a</sup> Wen-Tao Wu,<sup>a</sup> Song-Wei Lv,<sup>b</sup> Li-Ping Yan,<sup>a</sup> Yan-Ling Liu<sup>\*a</sup> and Wei-Hua Huang<sup>\*a</sup>*

a. College of Chemistry and Molecular Sciences, Wuhan University, Wuhan 430072, China.

b. School of Pharmacy, Changzhou University, Changzhou 213164, China.

E-mail: yanlingliu@whu.edu.cn; whhuang@whu.edu.cn.

## Supporting Figures

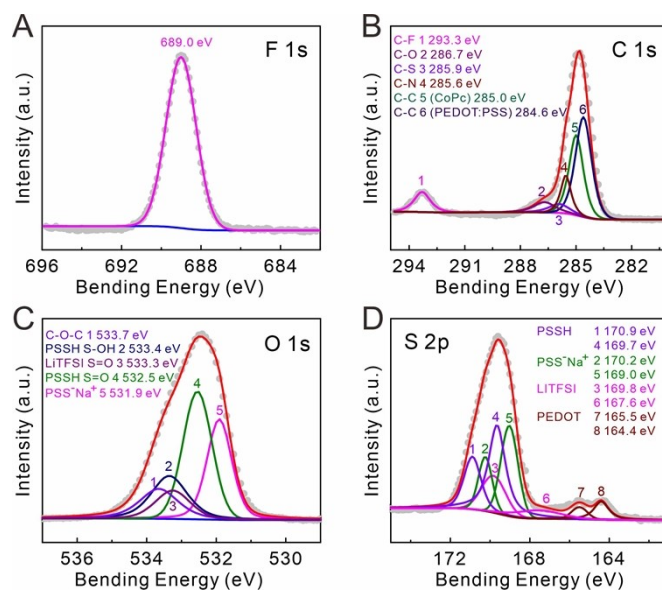

Figure S1. XPS spectra of (A) F 1s state, (B) C 1s state, (C) O 1s state, (D) S 2p state.

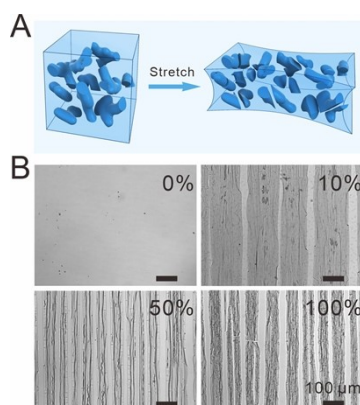

Figure S2. (A) Schematic illustration showing the stretchability principle of PP film. (B) Optical microscope images of PP/PDMS film recovering from being submitted to various strains.

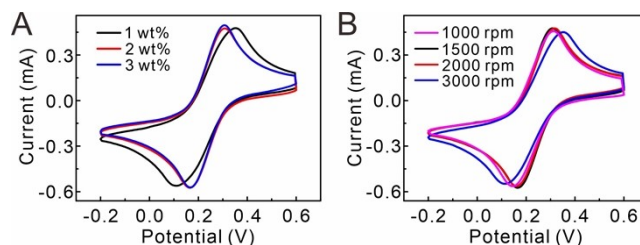

Figure S3. (A) CVs of PPL/PDMS films with different contents of LiTFSI at the spin-coating speed of 1500 rpm obtained in 10 mM  $K_3[Fe(CN)_6]$ . (B) CVs of PPL/PDMS films using different spin-coating speeds with 2 wt% LiTFSI obtained in 10 mM  $K_3[Fe(CN)_6]$ .

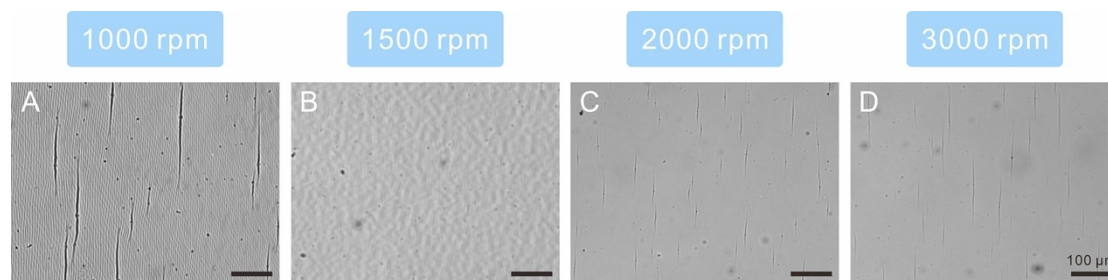

Figure S4. Optical microscope images of PPL/PDMS films with 2 wt% LiTFSI at different spin-coating speeds recovering from being stretched to a strain of 50%.

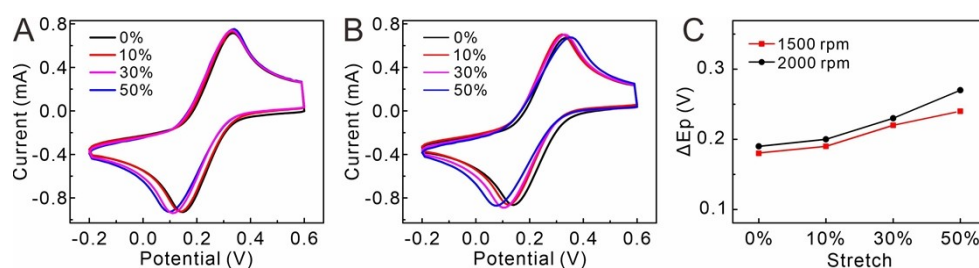

Figure S5. CVs of PPL/PDMS films with 2 wt% LiTFSI at a spin-coating speed of (A) 1500 rpm and (B) 2000 rpm obtained in 10 mM  $K_3[Fe(CN)_6]$  after being stretched to different tensile strains. (C) Potential differences of CVs obtained in 10 mM  $K_3[Fe(CN)_6]$  of PPL/PDMS films with 2 wt% LiTFSI at different spin-coating speeds under different strains.

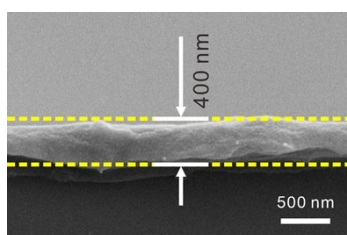

Figure S6. SEM image of the cross section of PPLC film.

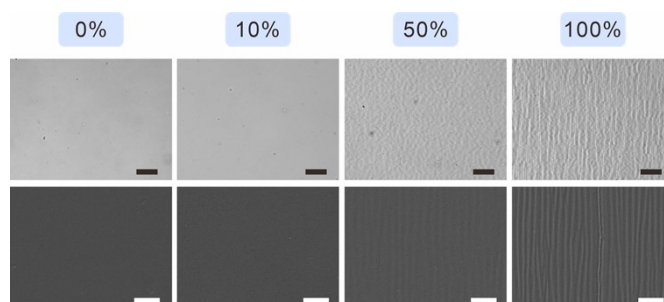

Figure S7. Optical microscope (top row) and SEM (bottom row) images of PPL/PDMS film recovering from being submitted to various strains. Scale bar: 100 μm (black) and 10 μm (white).

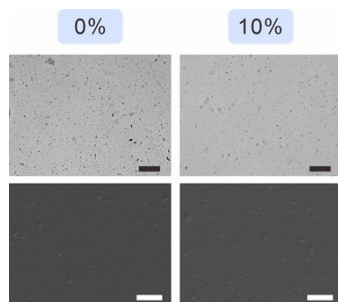

Figure S8. Optical microscope (top row) and SEM (bottom row) images of PPLC/PDMS film recovering from being submitted to various strains. Scale bar: 100 μm (black) and 10 μm (white).

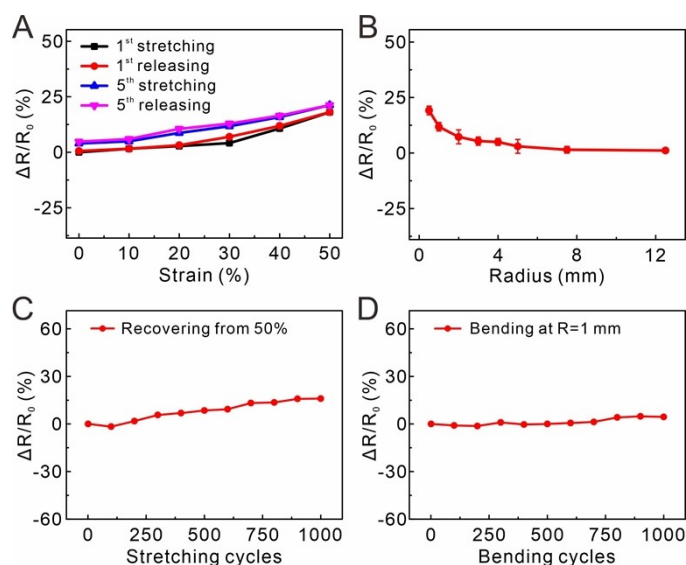

Figure S9. Relative difference in resistance of PPLC/PDMS as a function of (A) tensile strains (0~50%) in the first and fifth stretch-releasing and (B) various bending radii (from 0.5 mm to 12.5 mm, data presented as mean  $\pm$  SEM,  $n = 3$ ). (C, D) Relative difference in resistance of PPLC/PDMS during cyclic deformations.

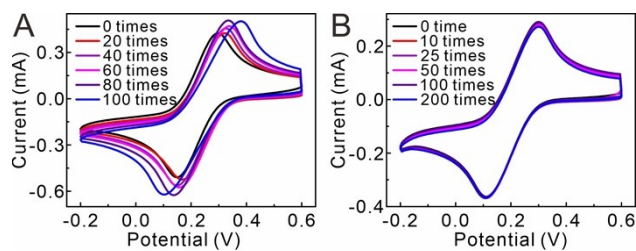

Figure S10. CVs of PPLC/PDMS obtained in 10 mM  $K_3[Fe(CN)_6]$  after recovering from being (A) stretched to 50% and (B) bended at a radius of 3 mm for different times.

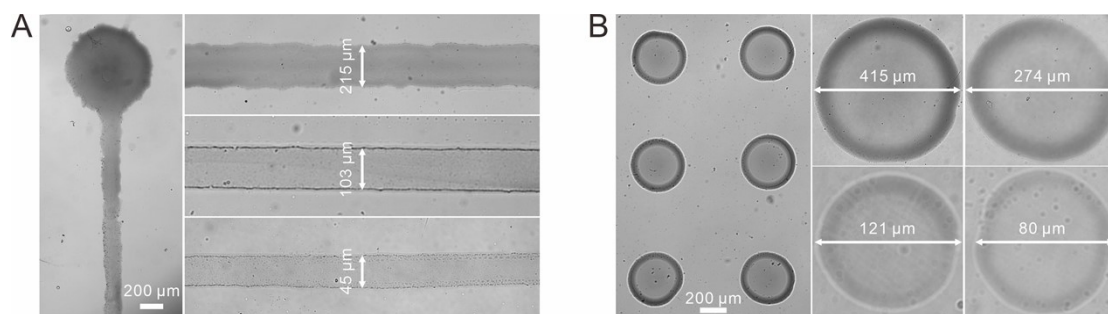

Figure S11. Optical microscope images of PPLC with controllable sizes obtained by photolithography (A) and inkjet printing (B).

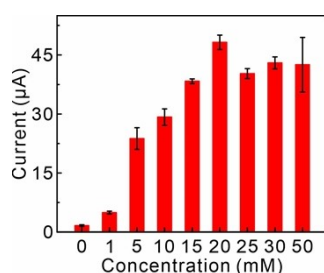

Figure S12. Statistical results of the current responses to 1 mM  $\text{H}_2\text{O}_2$  at the peak potential of +0.55 V (vs Ag/AgCl) of CVs of PPLC/PDMS films with different contents of CoPc (data presented as mean  $\pm$  SEM, n = 3).

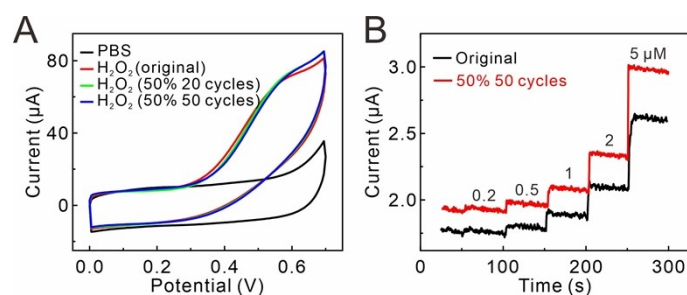

Figure S13. CV responses of PPLC/PDMS electrode in 1 mM  $\text{H}_2\text{O}_2$  (A) and amperometric responses of PPL/PDMS electrode to  $\text{H}_2\text{O}_2$  at a potential of +0.55 V (vs. Ag/AgCl) to increasing  $\text{H}_2\text{O}_2$  concentrations (B) before and after recovering from being repeatedly stretched to a strain of 50%.

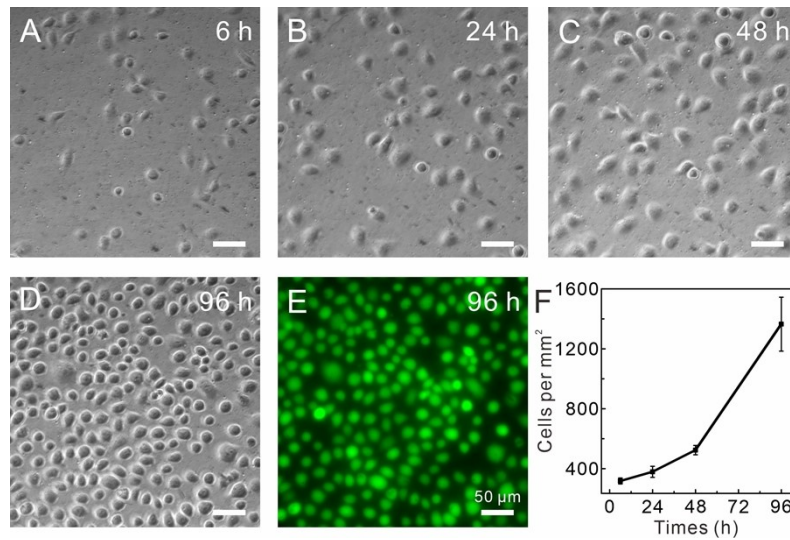

Figure S14. (A-D) The microscopic images of 16HBECs cultured on PPLC/PDMS film for different times. (E) Fluorescent microscopic image of 16HBECs stained with Calcein-AM (green) and PI (red) after cultured on PPLC/PDMS film for 96 h. (F) Proliferation curve of 16HBECs cultured on PPLC/PDMS film (data presented as mean  $\pm$  SEM, n = 5).

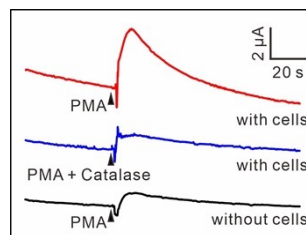

Figure S15. Amperometric responses detected from 16HBECs under stimulation of 50  $\mu$ M PMA.

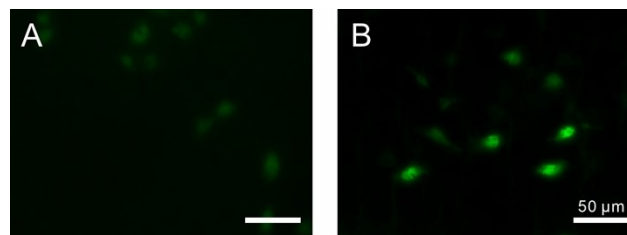

Figure S16. Fluorescence microscopic images of 16HBECs cultured on PPLC/PDMS film (A) without strain and (B) with a strain of 30% stained by DCFH-DA.

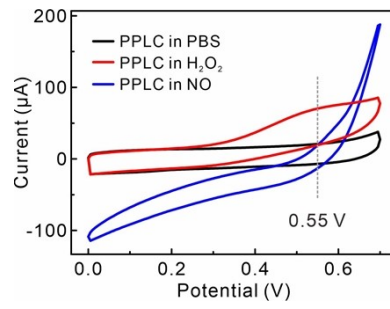

Figure S17. CVs of PPLC/PDMS electrodes in the PBS solution with and without 1 mM H<sub>2</sub>O<sub>2</sub> or NO.
